# Supplementary material for: Development of a homogeneous liquid–liquid microextraction method using lighter than water solvents for the extraction of some pesticides from distillate samples followed by GC-FID determination
Source: Royal Society of Chemistry journal article supplement (doi:10.1039/d5ra07135f), 2025-01-01
Supplement: d5ra07135f1.pdf [file d5ra07135f1.pdf]

## Supplementary materials

### **Development of a homogenous liquid-liquid microextraction method using lighter than water solvents for the extraction of some pesticides from distillate samples followed by GC-FID determination**

Mahsa Ghoreishizadeh <sup>a</sup>, Mir Ali Farajzadeh <sup>a,b\*</sup>, Sanaz Barazandeh <sup>a</sup>, Mohammad Reza Afshar Mogaddam <sup>c,d,e</sup>

<sup>a</sup> Department of Analytical Chemistry, Faculty of Chemistry, University of Tabriz, Tabriz, Iran

<sup>b</sup> Engineering Faculty, Near East University, 99138 Nicosia, North Cyprus, Mersin 10, Turkey

<sup>c</sup> Food and Drug Safety Research Center, Pharmaceutical Sciences Institute, Tabriz, University of Medical Sciences, Tabriz, Iran

<sup>d</sup> Research Center of New Material and Green Chemistry, Khazar University, 41 Mehseti Street, Baku AZ1096, Azerbaijan

<sup>e</sup> Pharmaceutical Sciences Institute, Tabriz, University of Medical Sciences, Tabriz, Iran

\*Corresponding author: M.A. Farajzadeh

Tel.: +98 41 33393084

Fax: +98 41 33340191

E-mail address: mafarajzadeh@yahoo.com; mafarajzadeh@tabrizu.ac.ir

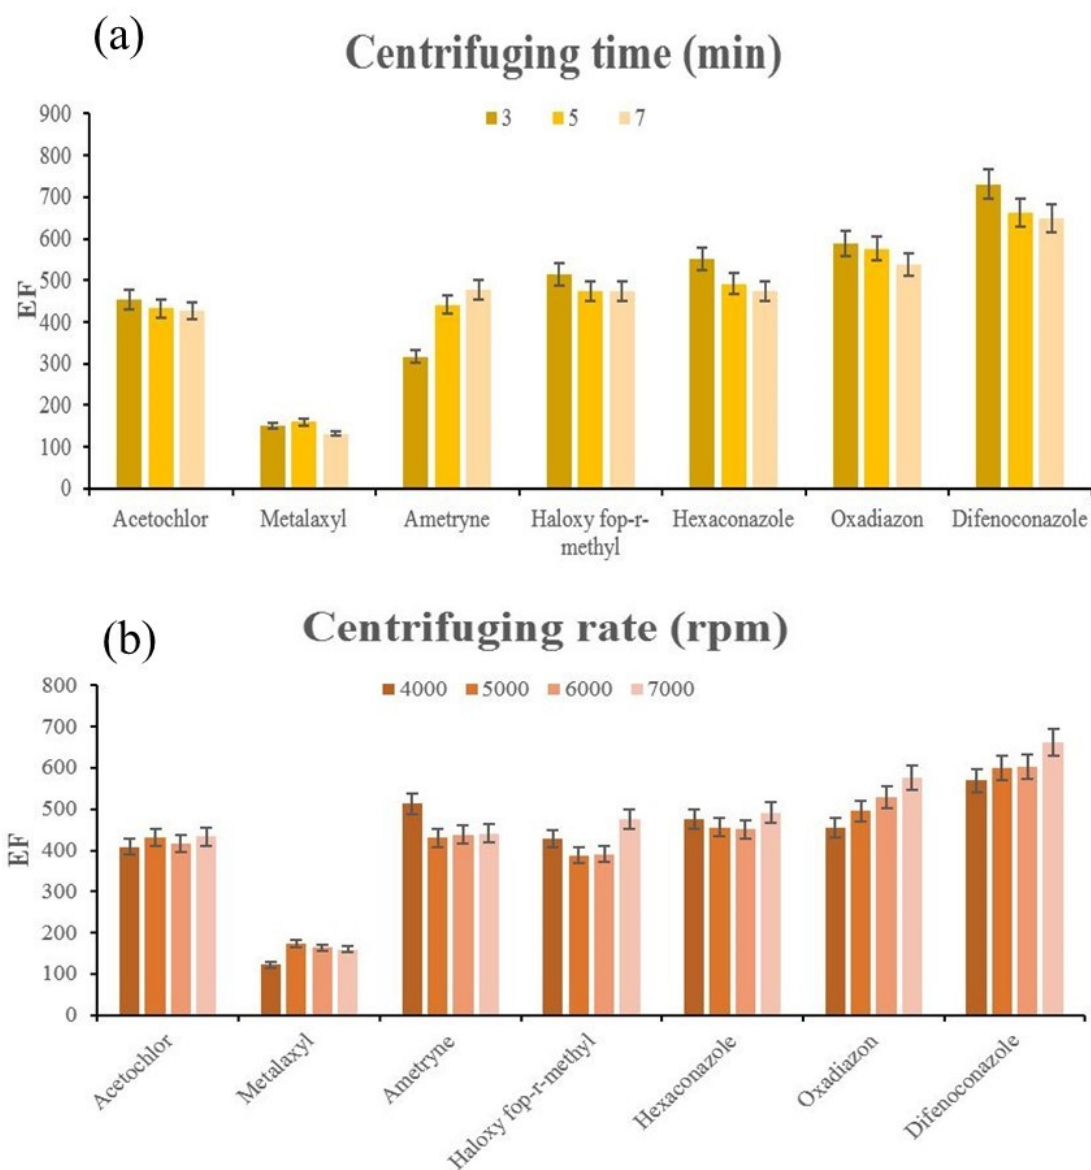

Fig. S1. Optimization of experimental parameters affecting the extraction efficiency of the proposed HLLME method:

(a) Centrifugation time.

Extraction conditions: are the same as those used in Figure 2e, except that pH 7.0 was used.

(b) Centrifugation rate.

Extraction conditions: are the same as those used in Figure S1a, except that centrifuging time was performed for 5 min.
